# Supplementary material for: Hydrogen storage by physisorption on nanostructured graphite plateletsElectronic supplementary information (ESI) available: Fig. 1S: Potential energy surface of H2 parallel to benzene at the MP2 level. See http://www.rsc.org/suppdata/cp/b3/b316209e/
Source: Royal Society of Chemistry journal article supplement (doi:10.1039/b316209e), 2004-01-01

Figure 1S:

Potential energy surface of H<sub>2</sub> parallel to benzene at the MP2 level. Conventions as in Figures 2. The MP2 basis set converged energy is between the two green lines, closer to the upper one.

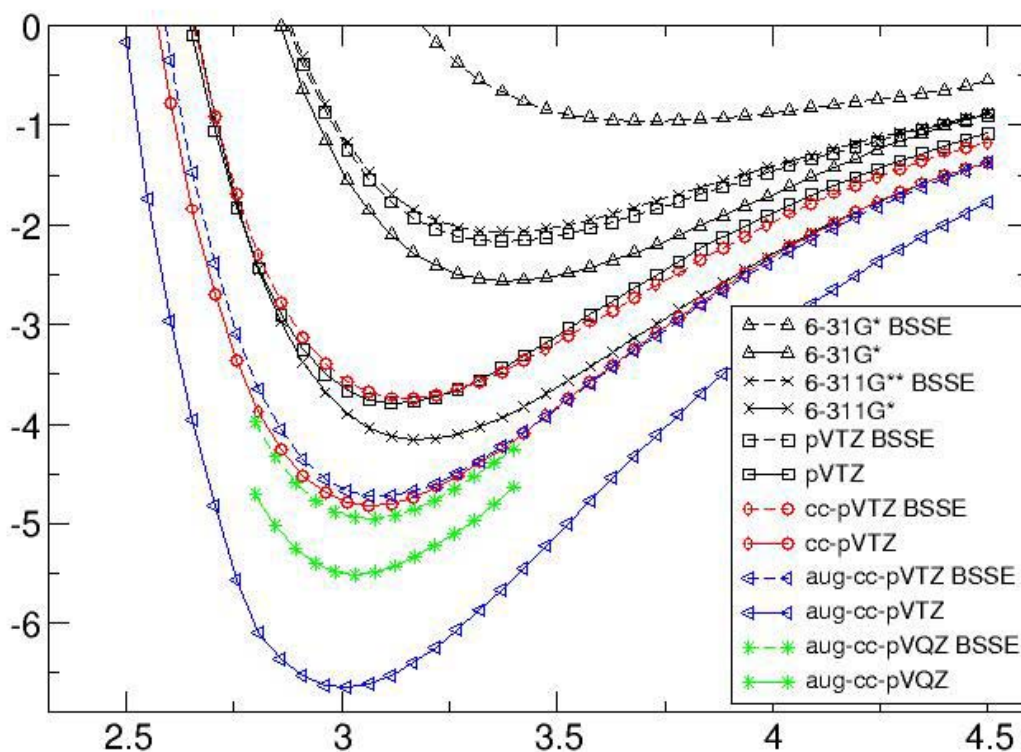

Supplement: b316209e.pdf [file b316209e.pdf]
